# Supplementary material for: Quantifying CanESM5 and EAMv1 sensitivities to Mt. Pinatubo volcanic forcing for the CMIP6 historical experiment
Source: Copernicus journal article supplement (doi:10.5194/gmd-13-4831-2020), 2020-10-09
Supplement: Supplementary file [file gmd-13-4831-2020-supplement.pdf]

Supplement of Geosci. Model Dev., 13, 4831–4843, 2020  
<https://doi.org/10.5194/gmd-13-4831-2020-supplement>  
© Author(s) 2020. This work is distributed under  
the Creative Commons Attribution 4.0 License.

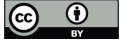

*Supplement of*

## **Quantifying CanESM5 and EAMv1 sensitivities to Mt. Pinatubo volcanic forcing for the CMIP6 historical experiment**

**Landon A. Rieger et al.**

*Correspondence to:* Landon A. Rieger ([landon.rieger@usask.ca](mailto:landon.rieger@usask.ca))

The copyright of individual parts of the supplement might differ from the CC BY 4.0 License.

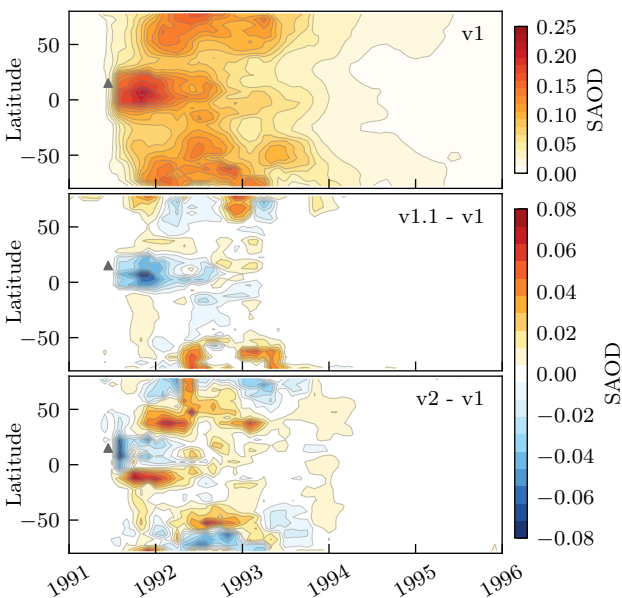

Figure S1: Same as Figure 1, except showing SAOD differences between GloSAC versions. The top panel shows SAOD at 525nm from version 1. The middle panel shows absolute SAOD differences between version 1 and 1.1. The bottom panel shows differences between version 1 and version 2.

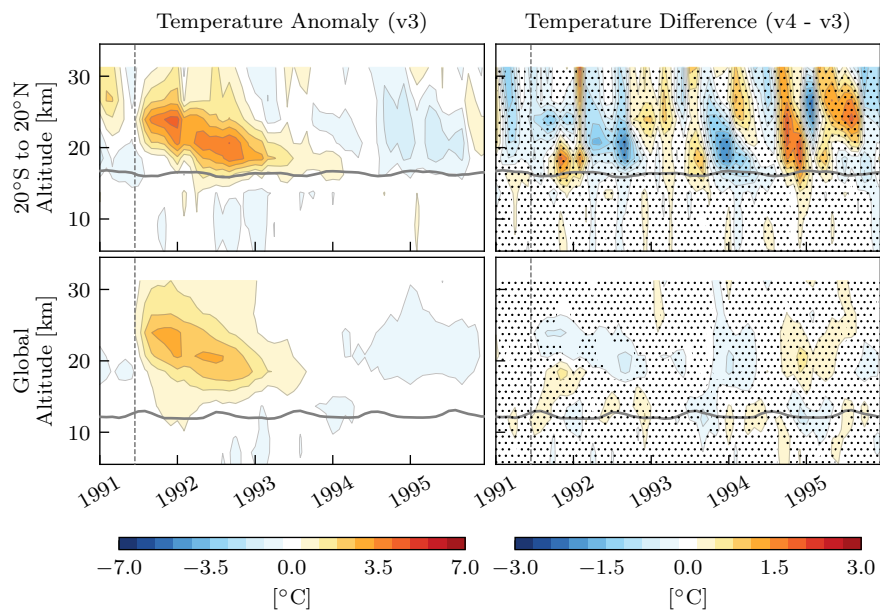

Figure S2: Same as Figure 5, except with atmosphere-only simulations from EAMv1.
